# Supplementary material for: Hox11-expressing interstitial cells contribute to adult skeletal muscle at homeostasis
Source: Oxford University Press journal article supplement (doi:10.1242/dev.201026), 2023-02-15
Supplement: dev201026supp.pdf [file dev201026supp.pdf]

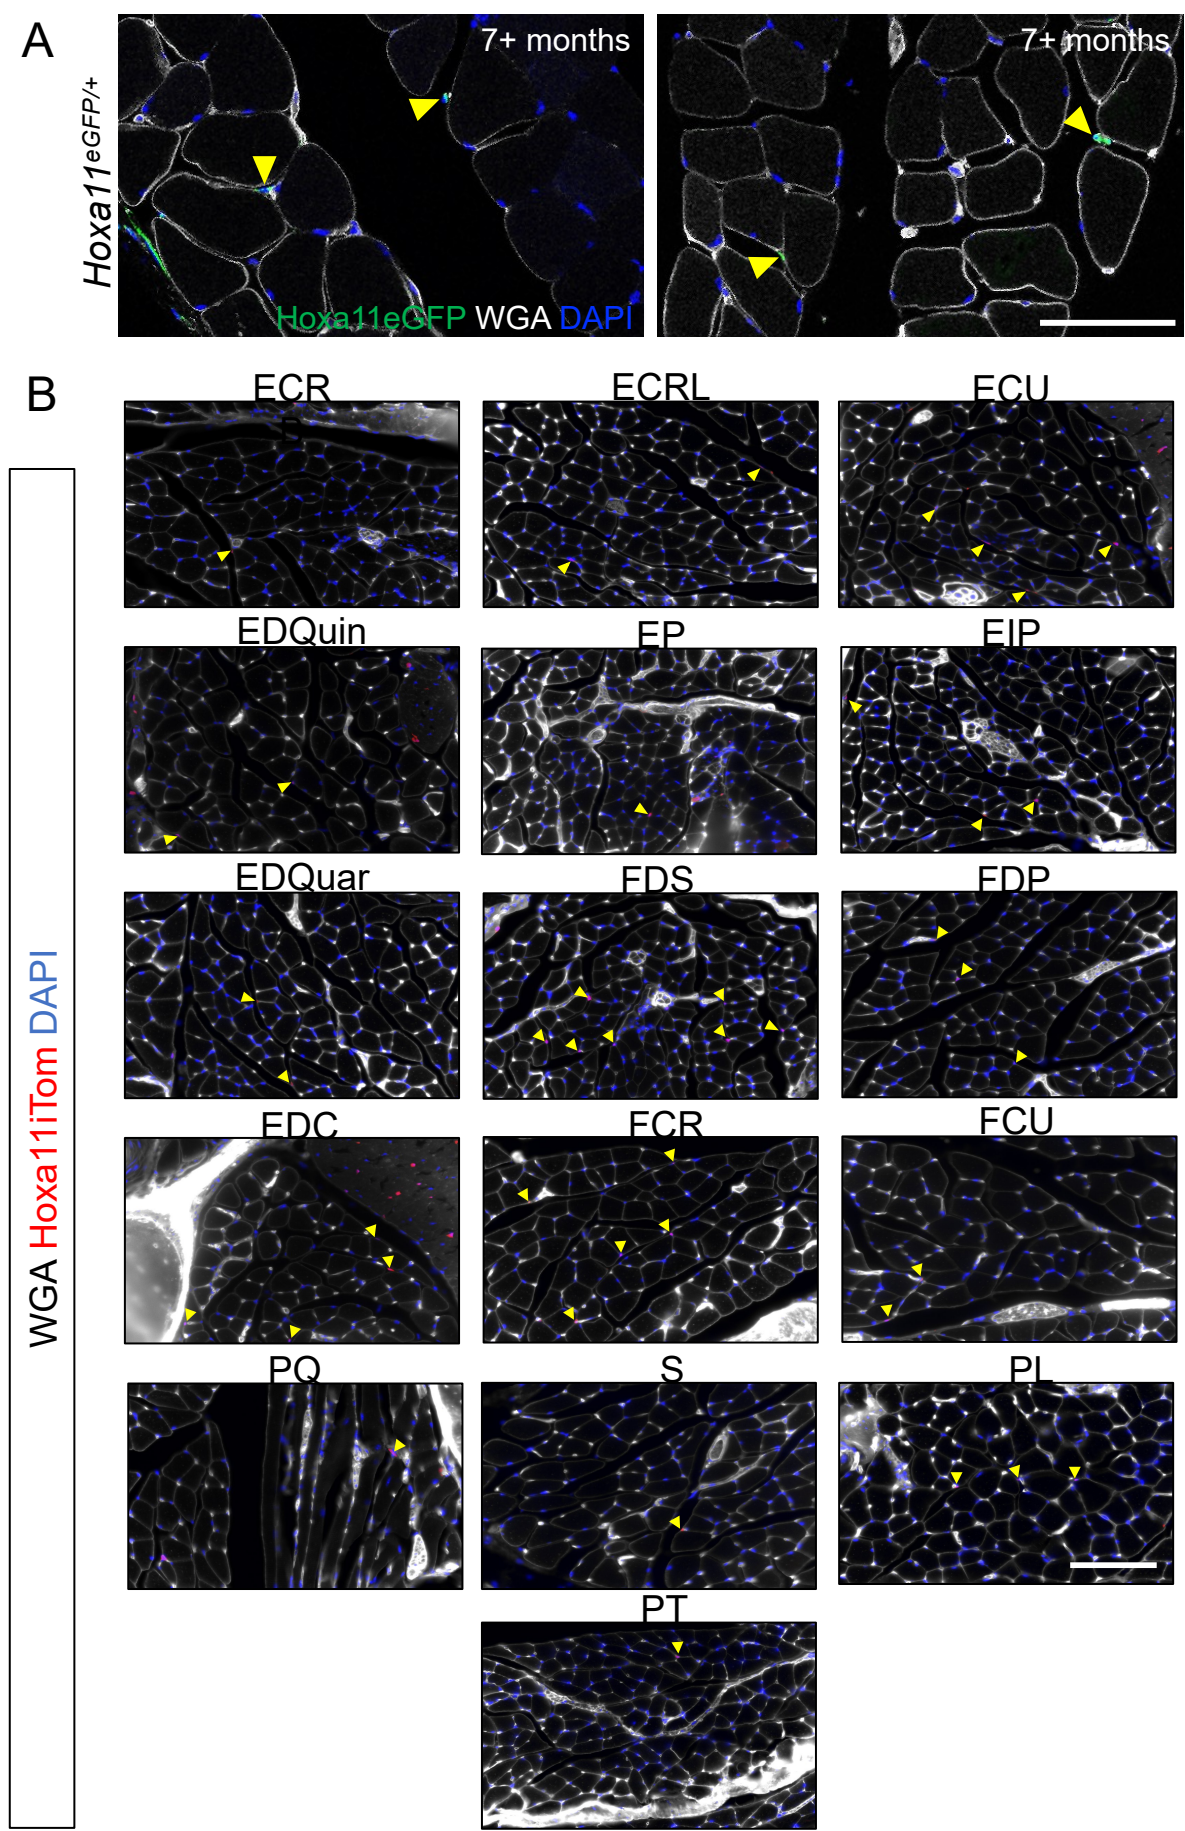

**Figure S1. Hoxa11 expression in muscle interstitial cells is observed in aged mice and Hoxa11 lineage labeling of interstitial cells is observed in all forelimb muscles.** (A) High magnification confocal microscopy shows Hoxa11eGFP-positive cells (green, yellow arrowheads) are observed in the muscle interstitium, defined by WGA, in animals 7 month of age - 1year old. Scale bar = 75  $\mu$ m; N = 3 animals. (B) Expression of Hoxa11 in interstitial cells of individual forelimb muscles collected from *Hoxa11<sup>CreERT2/+</sup>*; *ROSA<sup>LSL-tdTomato/+</sup>* animals 3 days after tamoxifen treatment. High magnification images of Extensor Carpi Radialis Brevis (ECRB), Extensor Carpi Radialis Longus (ECRL), Extensor Carpi Ulnaris (ECU), Extensor Digiti Quinti (EDQuin), Extensor Pollicis (EP), Extensor Indicis Proprius (EIP), Extensor Digiti Quarti (EDQuar), Flexor Digitorum Sublimis (FDS), Flexor Digitorum Profundus (FDP), Extensor Digitorum Communis (EDC), Flexor Carpi Radialis (FCR), Flexor Carpi Ulnaris (FCU), Pronator Quadratus (PQ), Supinator (S), Palmaris Longus (PL), and Pronator Teres (PT). Scale bar = 100  $\mu$ m; N = 4 animals.

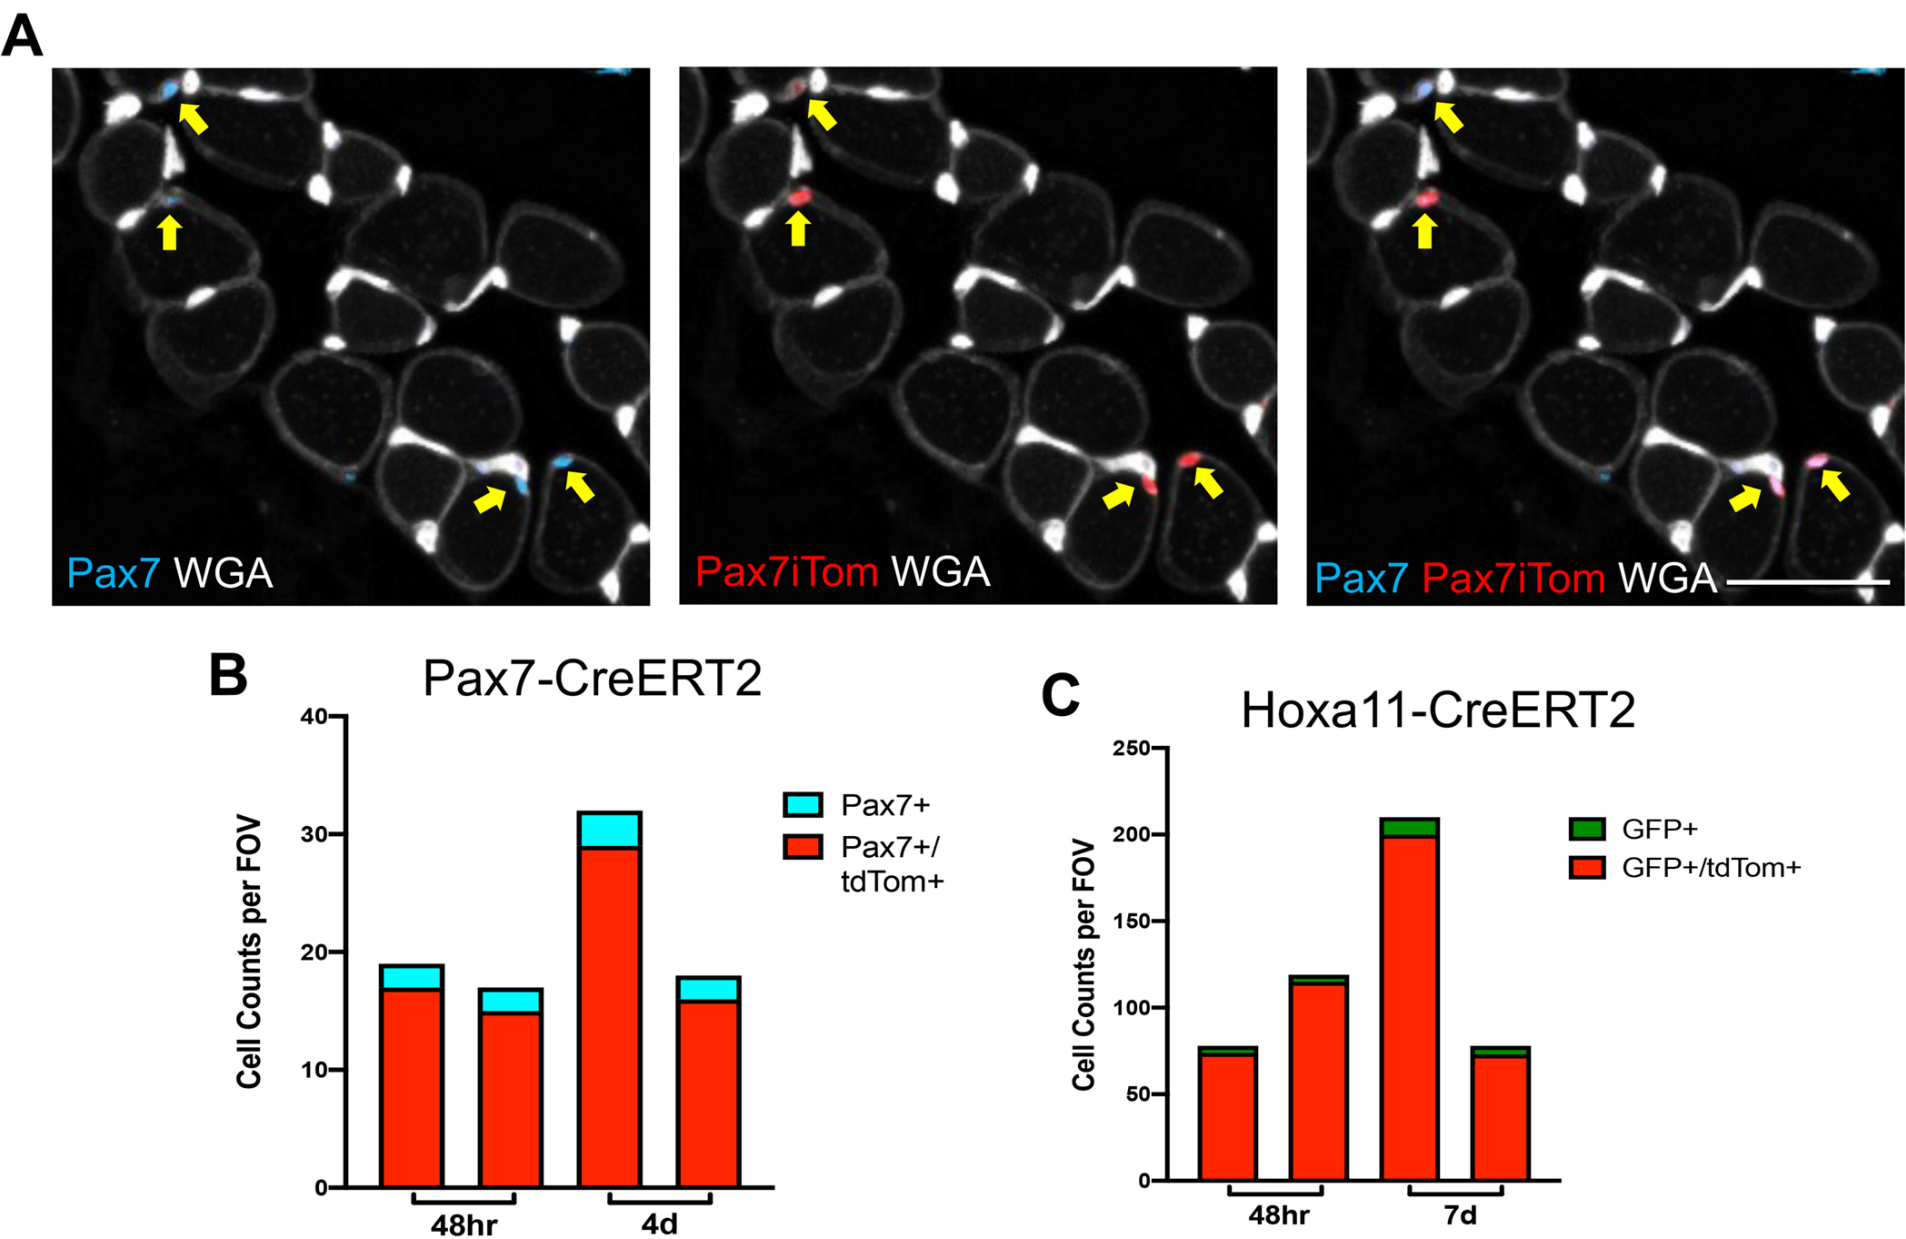

**Fig. S2. Both *Hoxa11-CreERT2* and *Pax7-CreERT2* show approximately 90% efficiency with lineage reporter ROSA-LSL-tdTomato.** (A) Images show Pax7 IF staining (blue) overlaps with tdTomato (red) in Pax7 lineage reporter animals (Pax7iTom) 4 days after tamoxifen treatment. Scale Bar = 50  $\mu$ m. (B) Quantification of Pax7-CreERT2 efficiency was assessed by counting the number of Pax7 antibody-stained cells and tdTomato labeled cells at 48hrs (n= 2 animals) and 4 days (n= 2 animals) after Tamoxifen treatment. (C) Quantification of Hoxa11-CreERT2-induced recombination of ROSA-LSL-tdTomato with a single 5mg bolus of tamoxifen was assessed by counting the number of Hoxa11eGFP and tdTomato labeled cells at 48hrs (n=2 animals) and 7 days (n=2 animals) after tamoxifen administration. Both Cres resulted in approximately 90% efficiency.



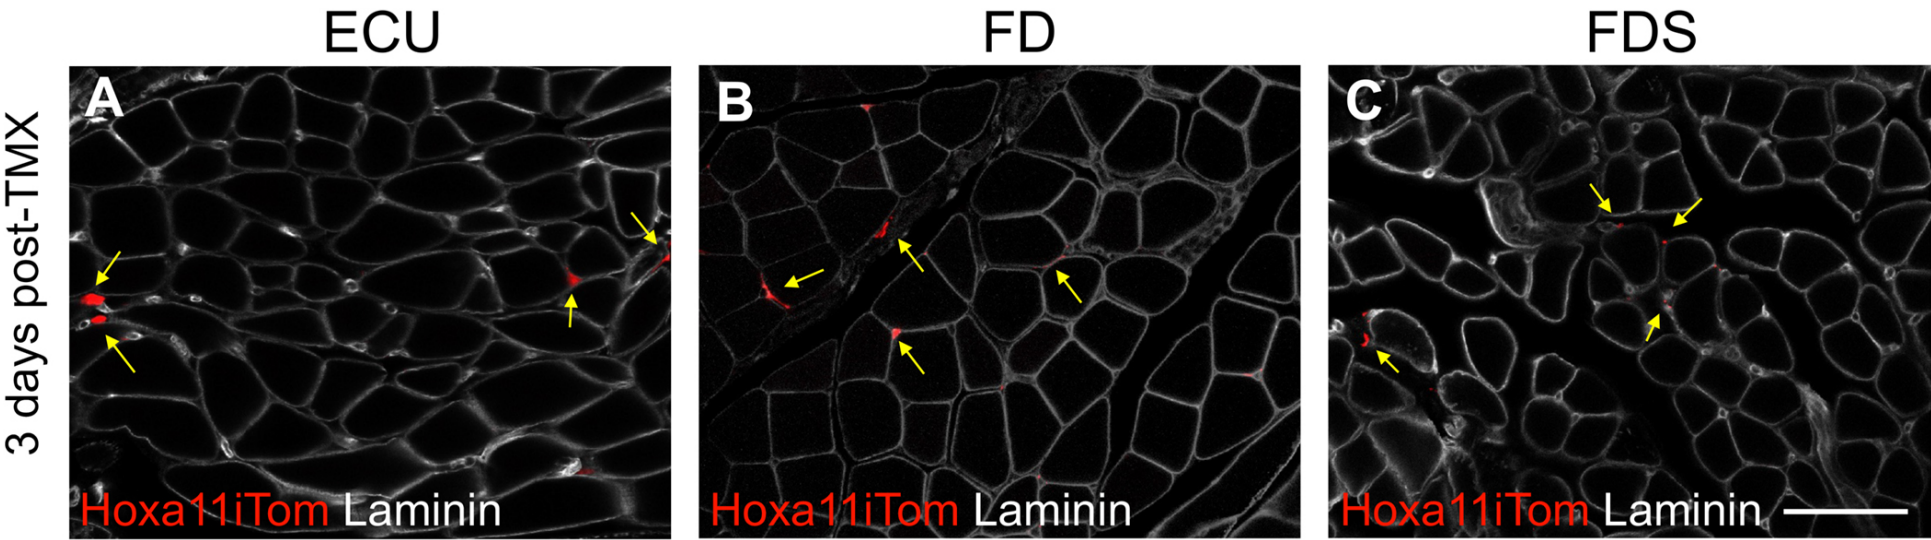

**Fig. S3. Hoxa11 expressing cells are only in the interstitium of zeugopod-attached muscles after initial recombination.** Hoxa11 lineage labeling (Hoxa11iTom, red) is observed 3 days following tamoxifen administration. **(A-C)** Hoxa11 lineage-labeled cells are only seen in the interstitium (yellow arrows) of the Extensor Carpi Ulnaris (ECU), Flexor Digitorum Profundus (FDP) and Flexor Digitorum Sublimis (FDS) as shown by laminin (white). Scale bar = 100  $\mu$ m. N = 4 animals.

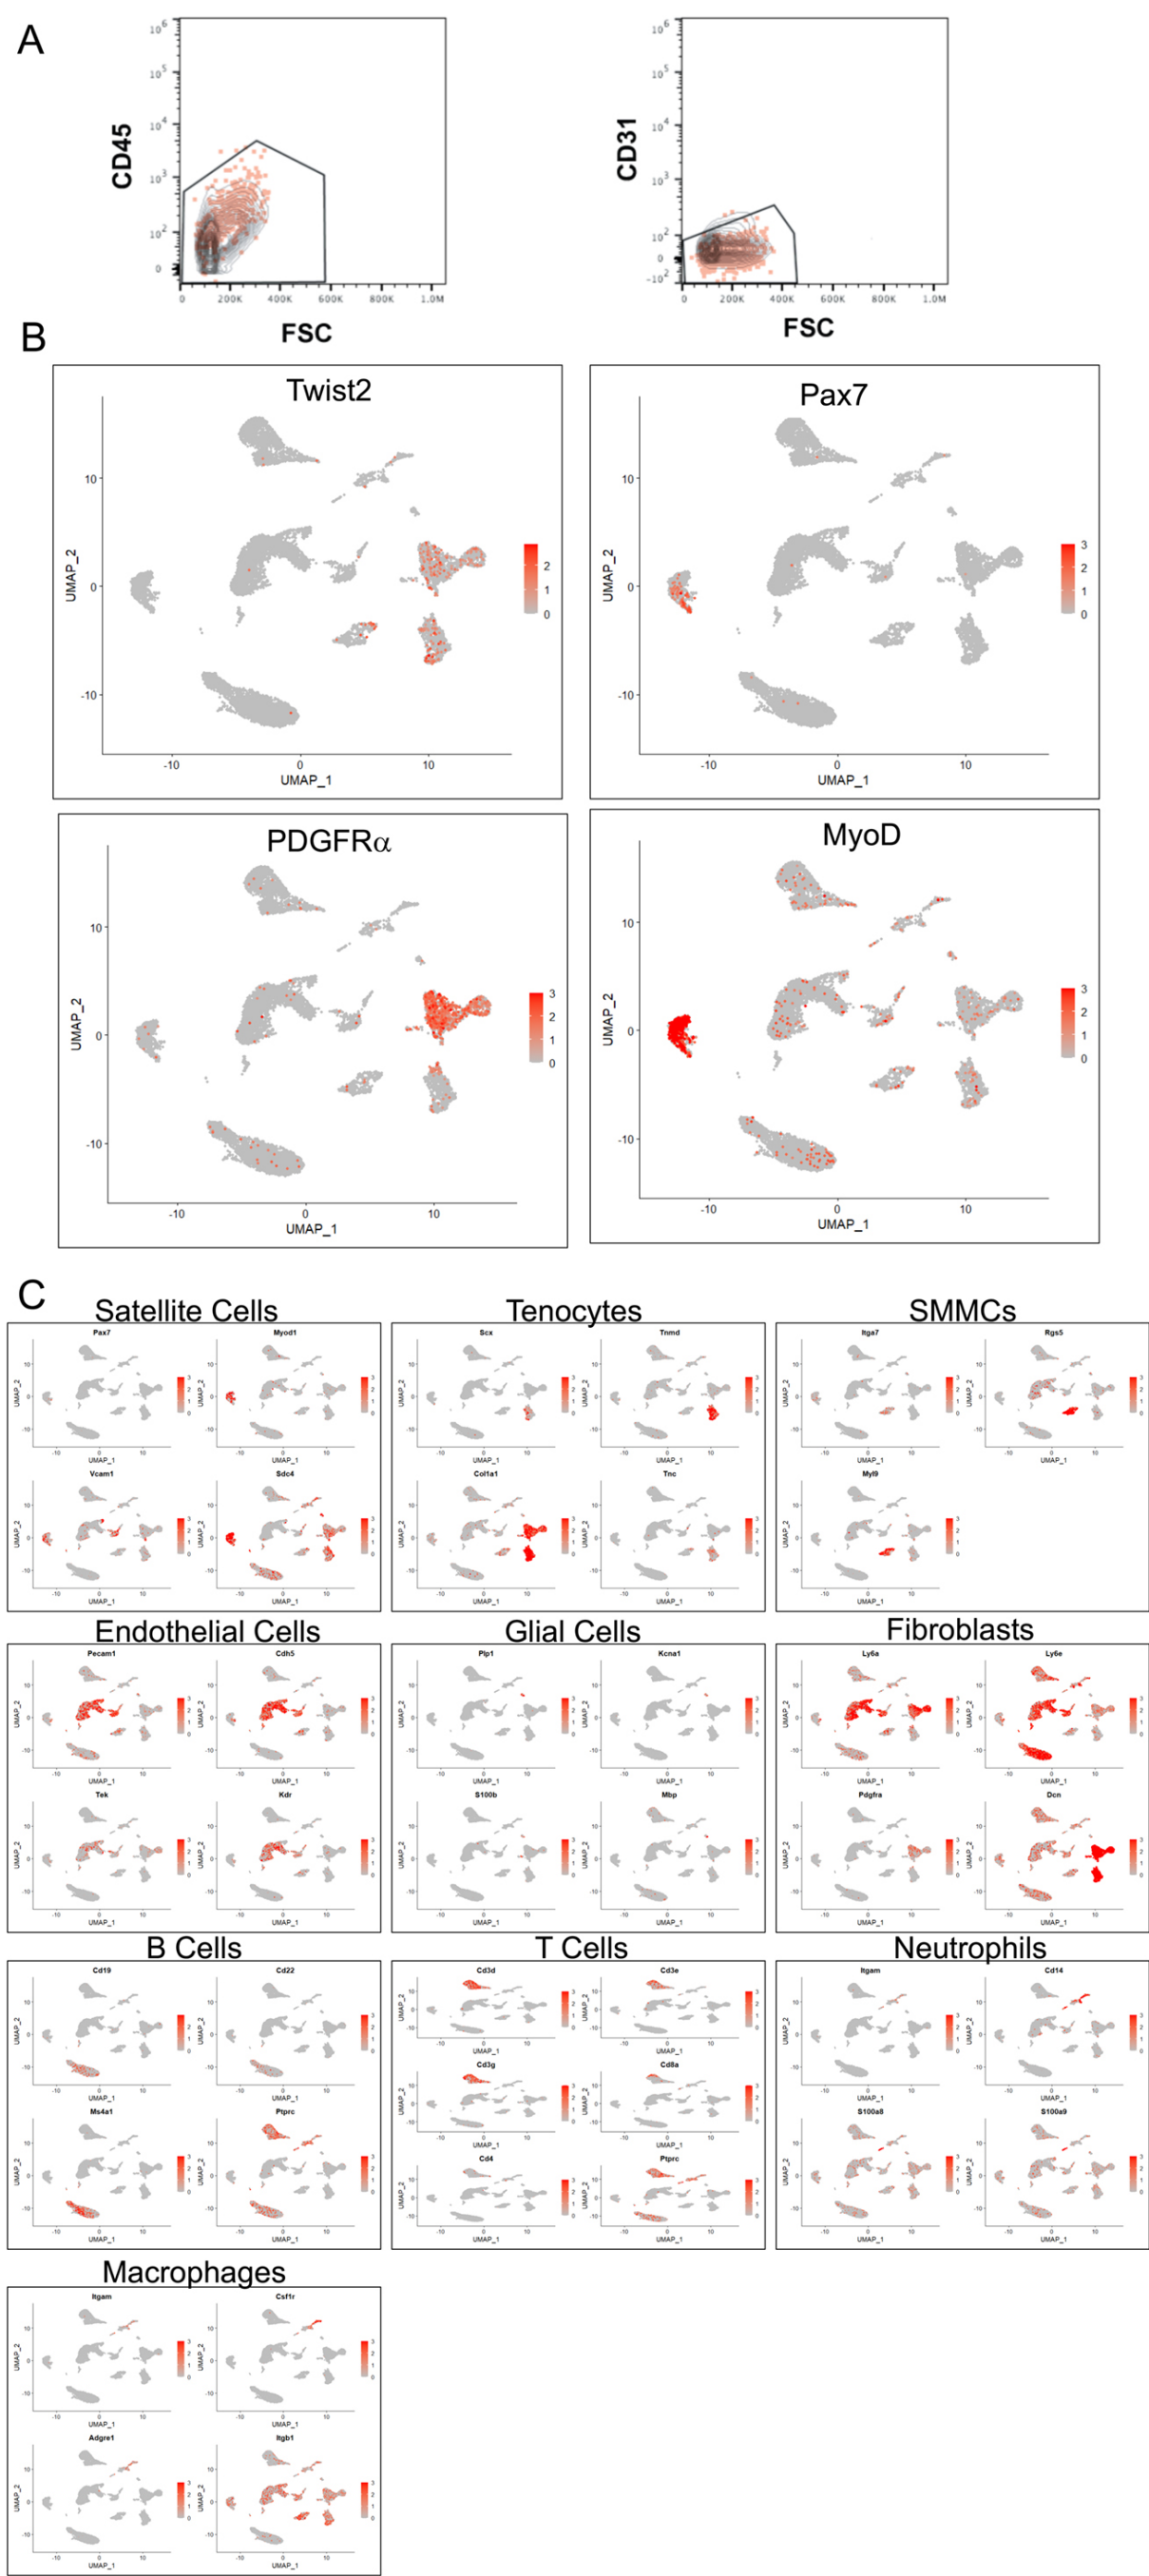



**Fig. S4. Further flow cytometry and Sing-cell RNA-sequencing analyses. (A)** Hoxa11iTom<sup>+</sup> cells dotted (red) over contour plot of non-tdTom cells. The mononuclear subsets analyzed by flow cytometry were first gated to exclude hematopoietic and endothelial cells; Hoxa11iTom<sup>+</sup> cells are non-hematopoietic and no-endothelial. **(B)** Plotting single gene expressions onto a UMAP projection show Twist2 and PDGFR $\alpha$  predominantly in fibroblasts, and Pax7 and MyoD predominantly found in satellite cells though low representations of each of these four genes are found in other clusters, highlighting the imprecision of statistical clustering with limited representation of expressed gene sets that is characteristic of single cell sequencing. **(C)** Additional feature plots for additional markers used to define subsets.

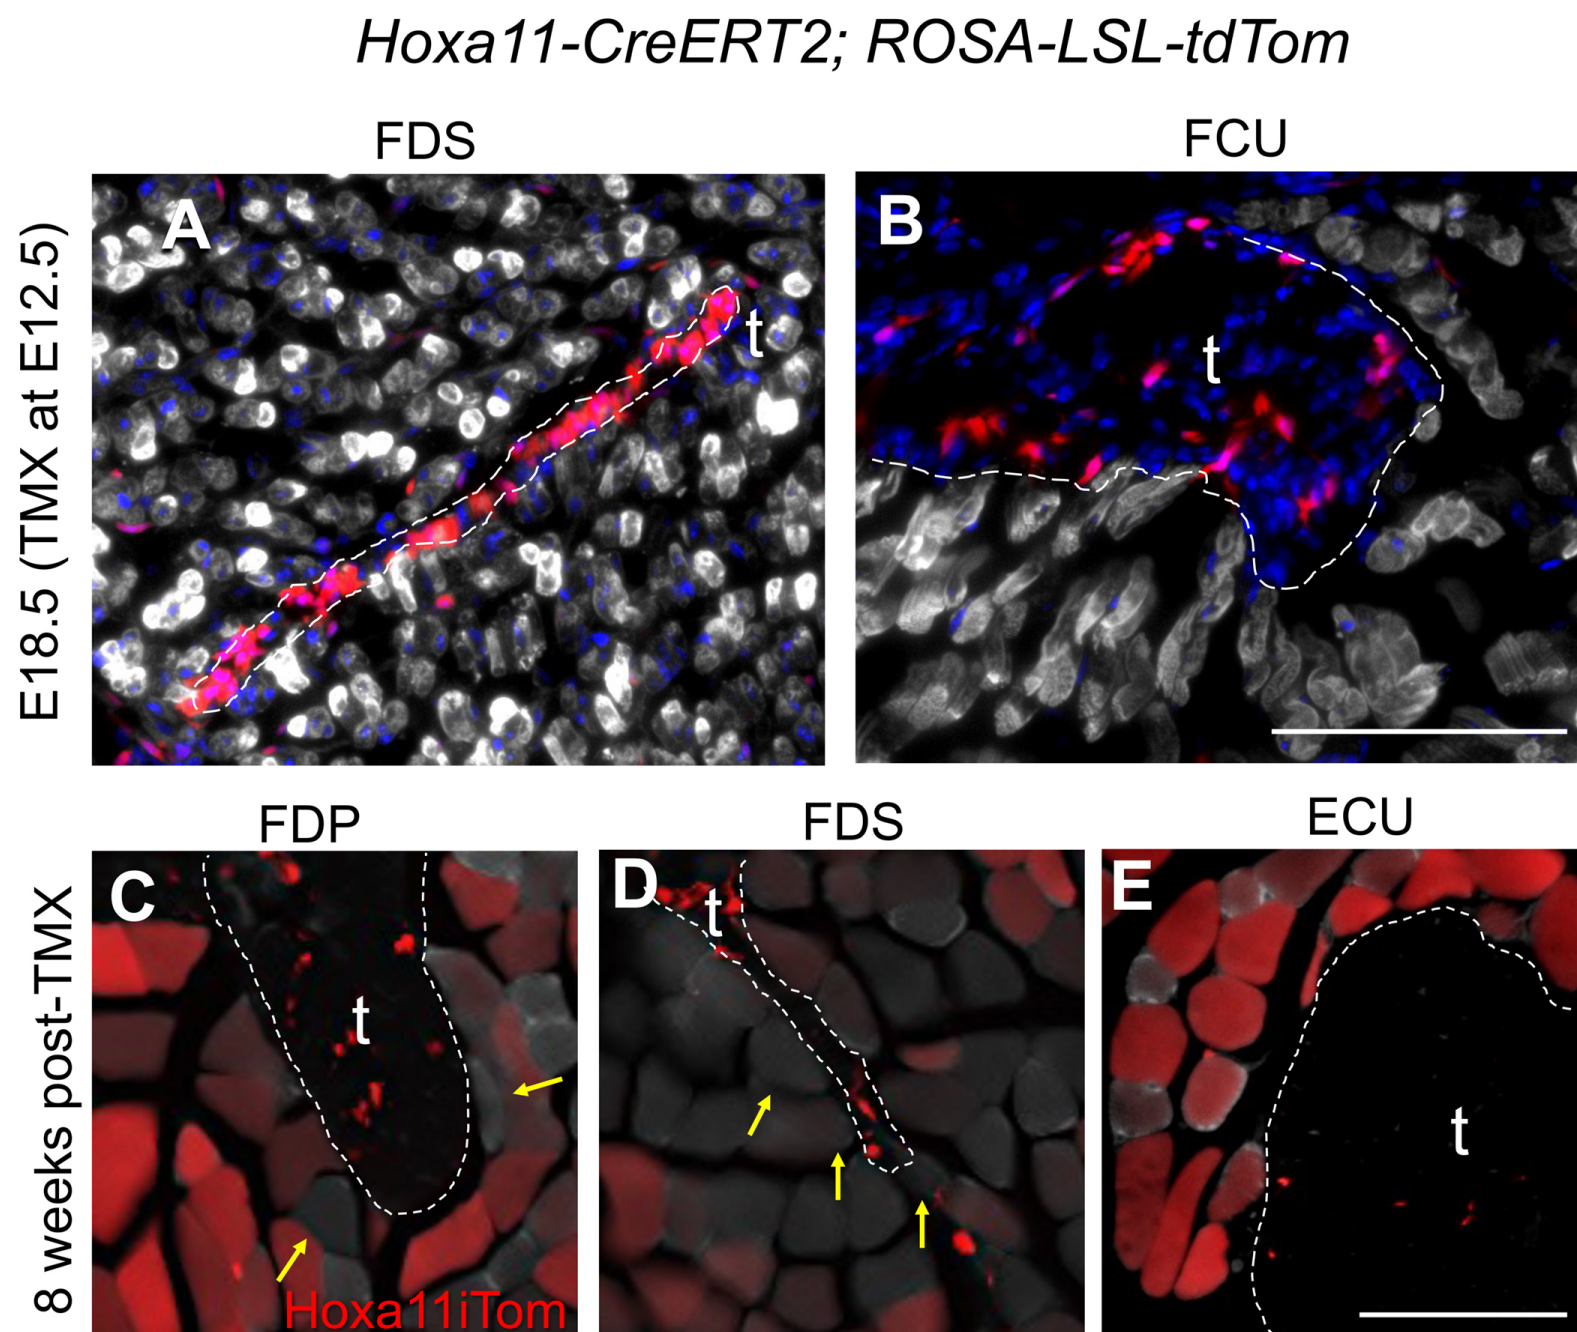

**Fig. S5. Hoxa11 lineage shows no preferential contribution to myofibers near the myotendinous junctions during embryogenesis or homeostasis.** (A,B) Sections of embryonic forelimb muscles were analyzed for myofiber lineage contribution at E18.5. N = 3 animals. (C-E) Images of the Flexor Digitorum Sublimis (FDS) and Flexor Carpi Ulnaris (FCU) muscles at the myotendinous junction show no Hoxa11iTom (red) overlap with My32 (white), consistent with lineage labeling throughout the rest of the muscle body. Sections from adult Hoxa11iTom muscle of the Flexor Digitorum Profundus (FDP), Flexor Digitorum Sublimis (FDS), and Extensor Carpi Ulnaris were analyzed for Hox11 lineage contribution at the myotendinous junction 8 weeks after the induction of lineage reporting. High magnification images show similar lineage labeling near the myotendinous junction of the FDP (C), FDS (D), or ECU (E) as in the mid-body of the muscle (Figure 4). N = 5 animals. Scale bars = 100  $\mu$ m. Tendons are outlined with dashed line and marked by t.



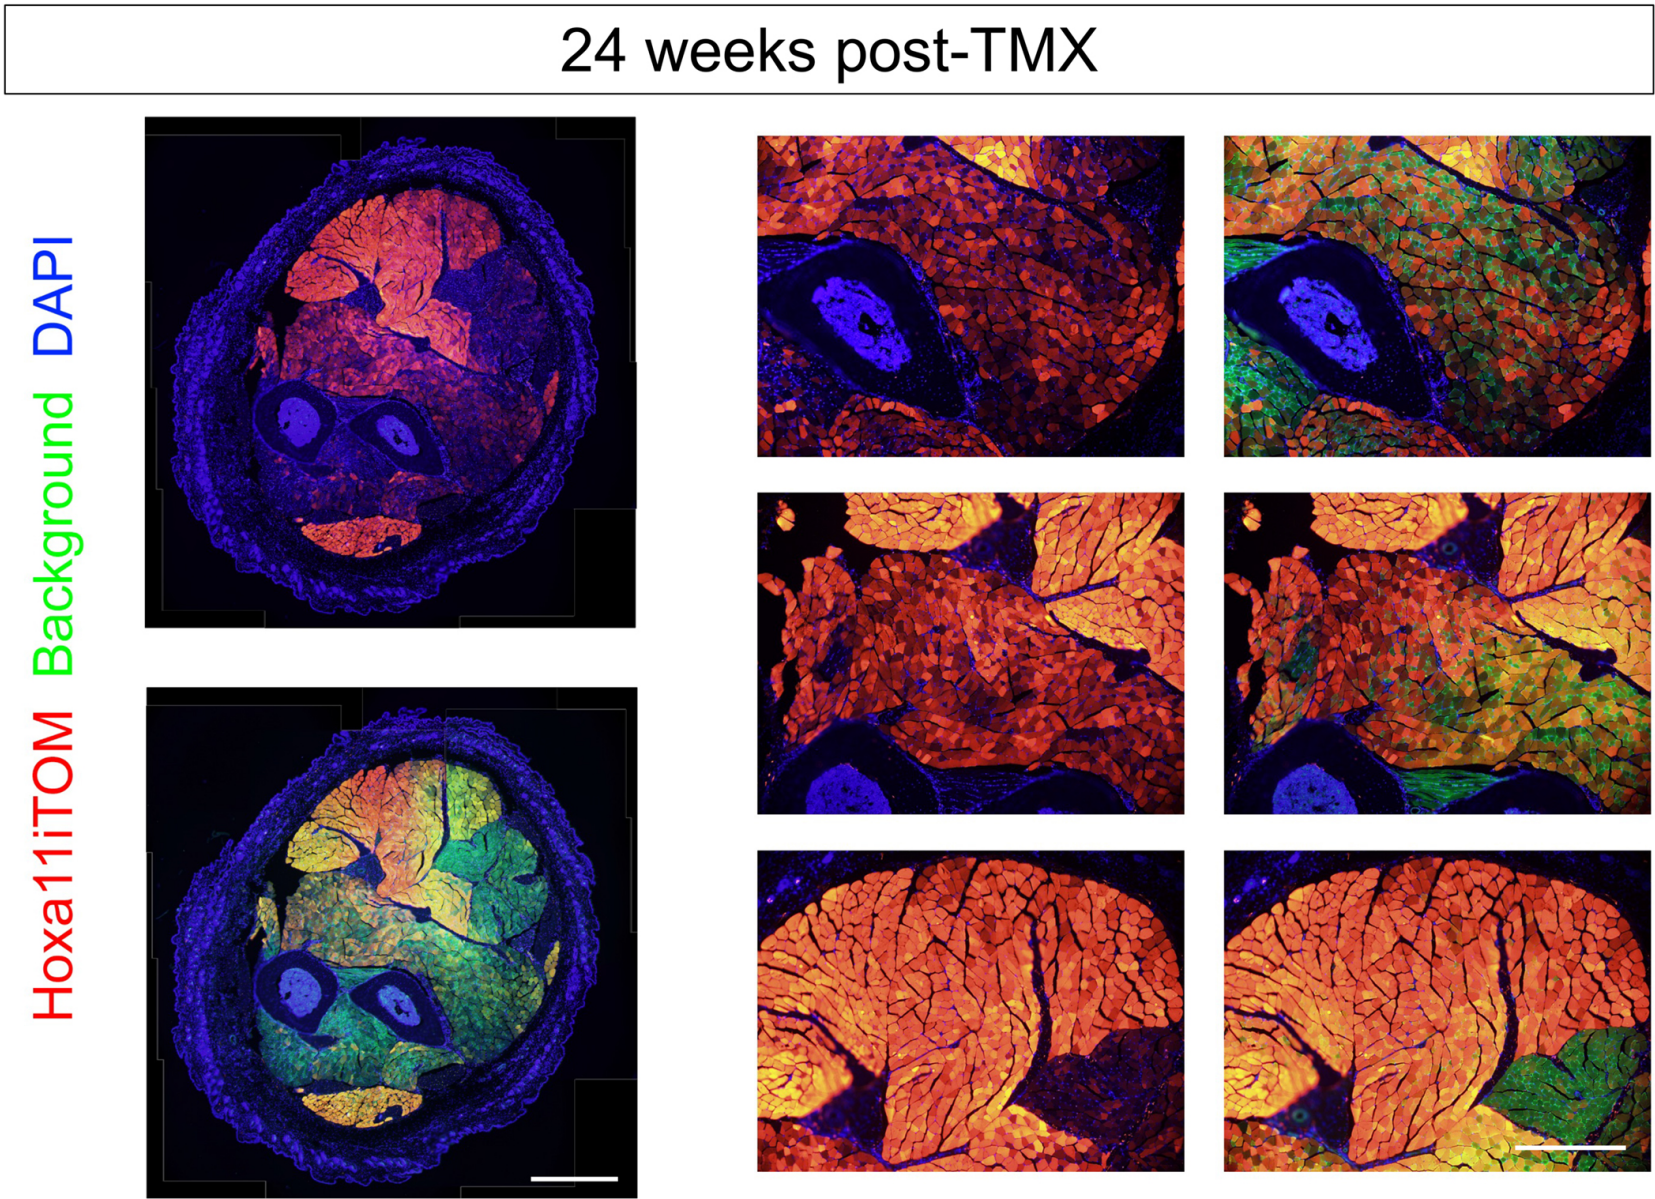

**Fig. S6. Hoxa11 lineage 24 weeks after reporter induction.** *Hoxa11<sup>CreERT2/+</sup>; ROSA<sup>LSL-tdTomato/+</sup>* mice were given 5mg tamoxifen at 8 weeks of age and collected 24 weeks (6 months) later. A full cross-section with and without background (green) show many *Hoxa11iTom*<sup>+</sup> (red) muscle fibers. Close-ups with and without background depict high levels of tdTomato within muscle fibers. Scale bars = 1000  $\mu$ m and 500  $\mu$ m, respectively. N = 2 animals.



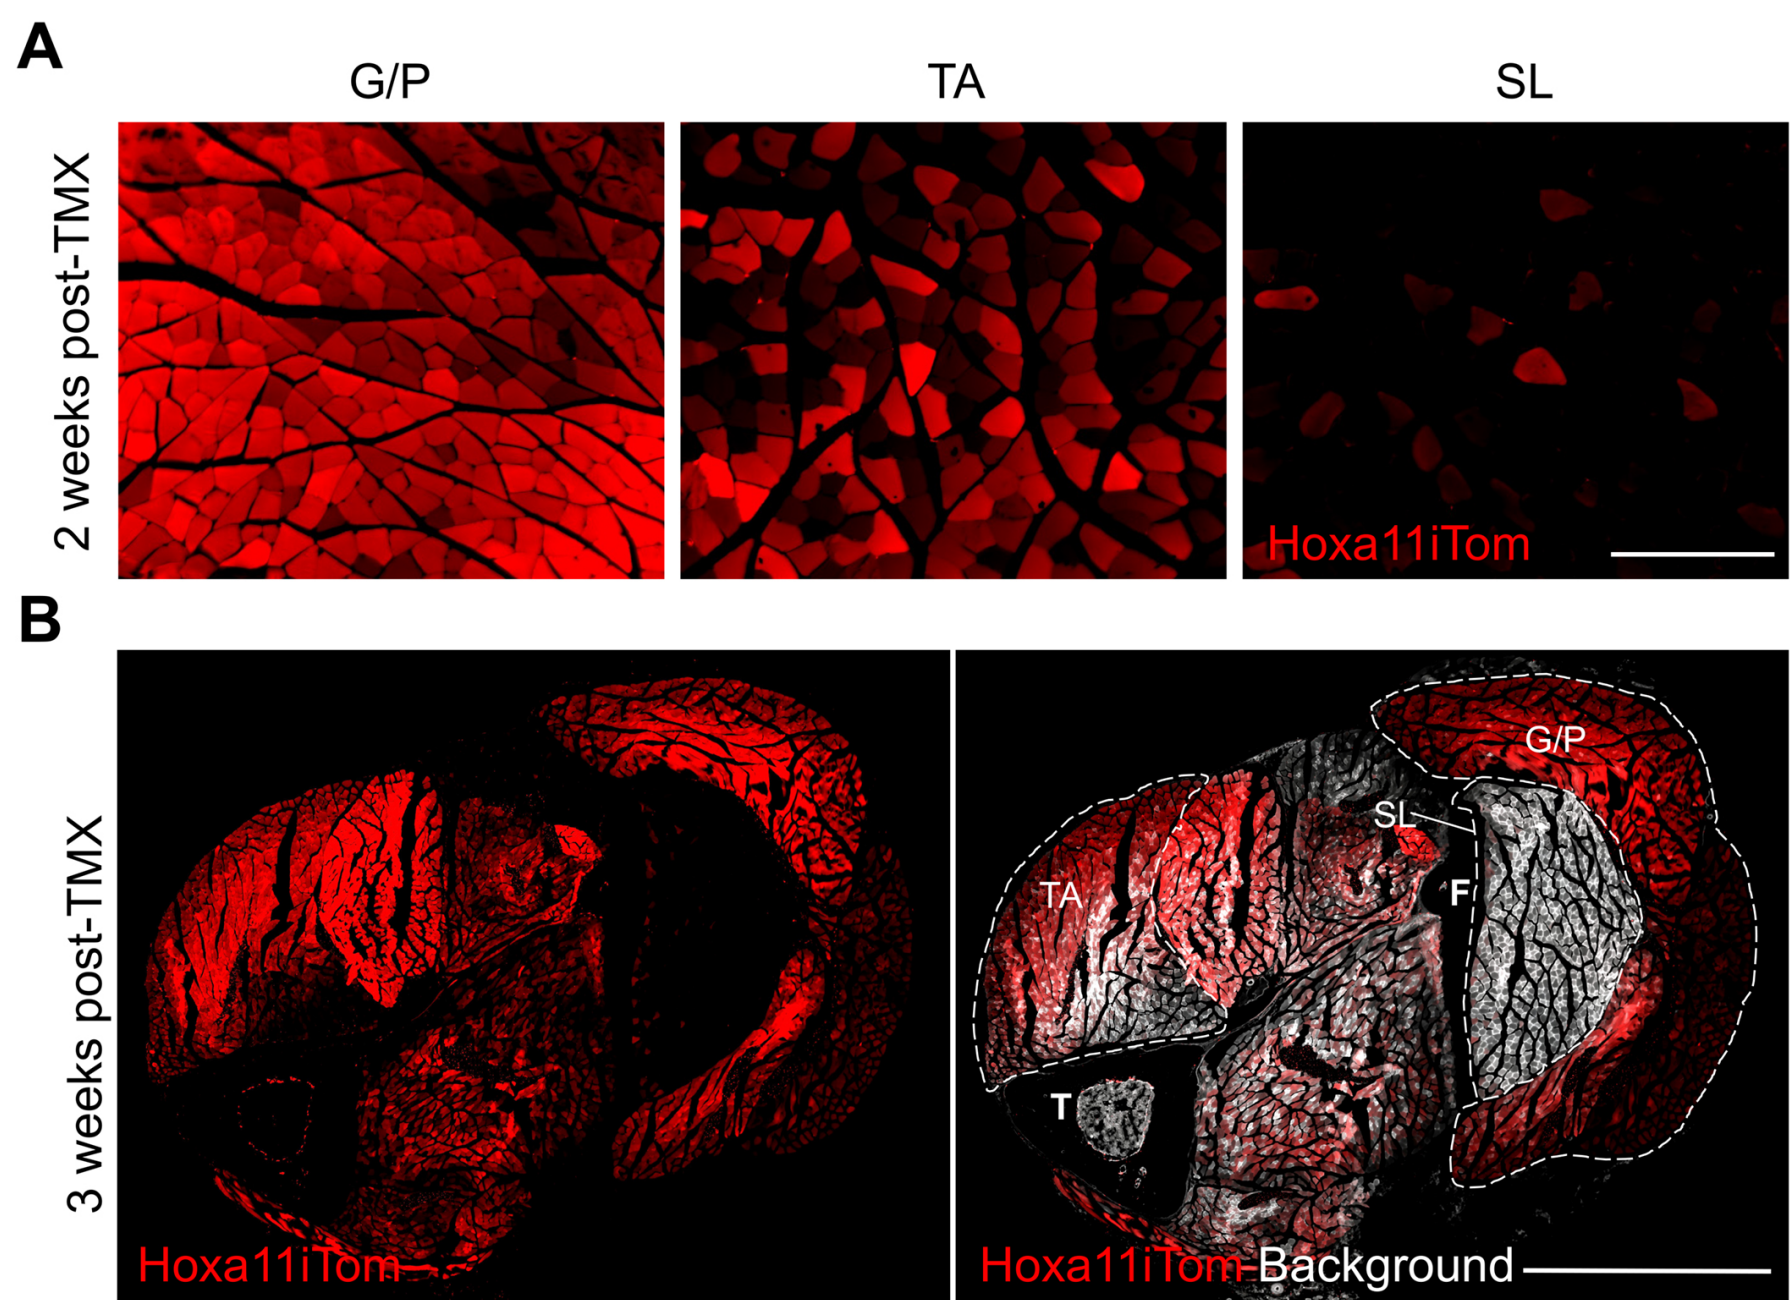

**Fig. S7. Hoxa11 lineage differentially contributes to hindlimb muscles.** (A) Hindlimb muscles taken from Hoxa11iTom animals 2 weeks after tamoxifen treatment show different levels of lineage contribution in the Gastrocnemius/Plantaris (G/P), Tibialis Anterior (TA), and Soleus (SL). Scale bar = 200  $\mu$ m. N = 4 animals. (B) A whole hindlimb cross-section from an animal 3 weeks after the start of lineage labeling shows variable tdTom expression in muscles of the hindlimb. T and F mark the tibia and fibula, respectively. Scale bar = 1000  $\mu$ m. N = 1 animal. Muscles shown in A are outlined and labeled in B.



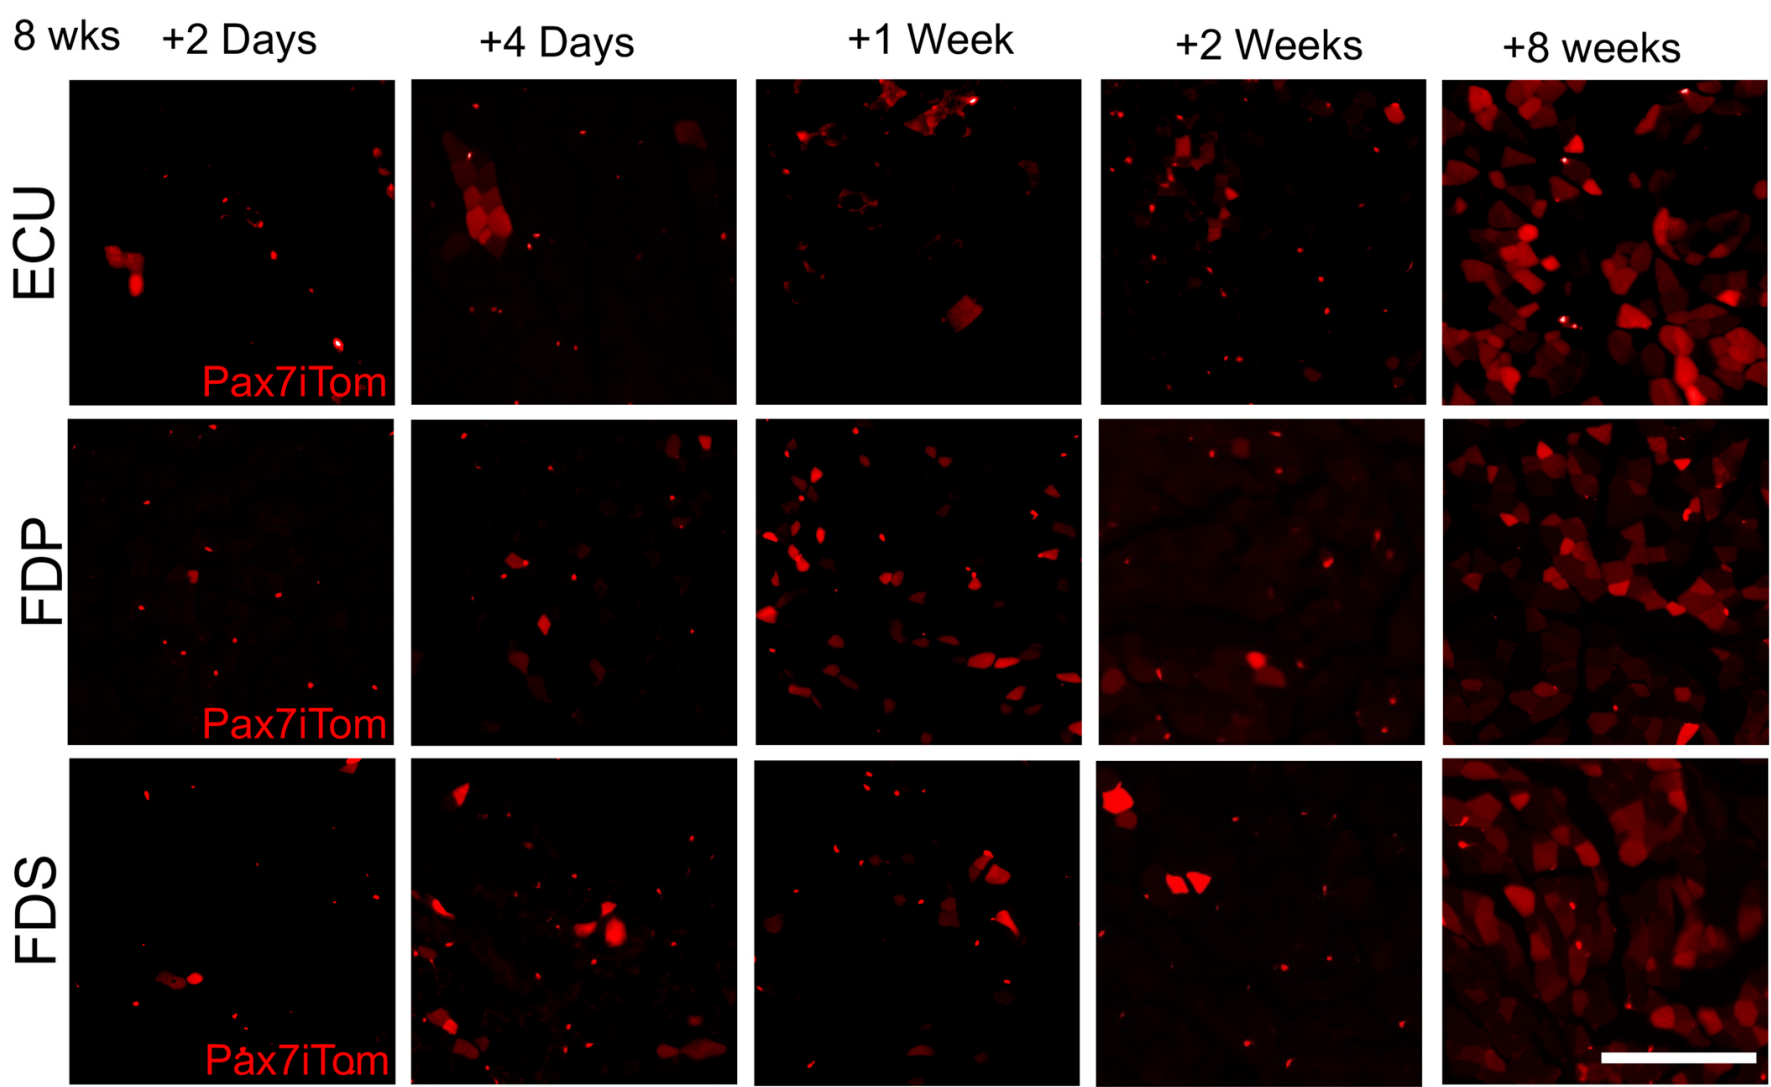

**Fig. S8. Pax7iTom lineage in the forelimb muscles.** *Pax7CreERT2; ROSALSL-TdTomato* (Pax7iTom) mice were given a single intraperitoneal injection of 5 mg tamoxifen at 8 weeks of age and collected at 2 days, 4 days, 1 week, 2 weeks, and 8 weeks after tamoxifen induction. Images of the Extensor Carpi Ulnaris (ECU), Flexor Digitorum Profundus (FDP) and Flexor Digitorum Sublimis (FDS) muscles show tdTom+ myofibers as well as tdTom+ satellite cells. N = 3 (2d, 4d, 7d, 2wk) and 4 (8wk) animals per timepoint. Scale bar = 200  $\mu$ m.

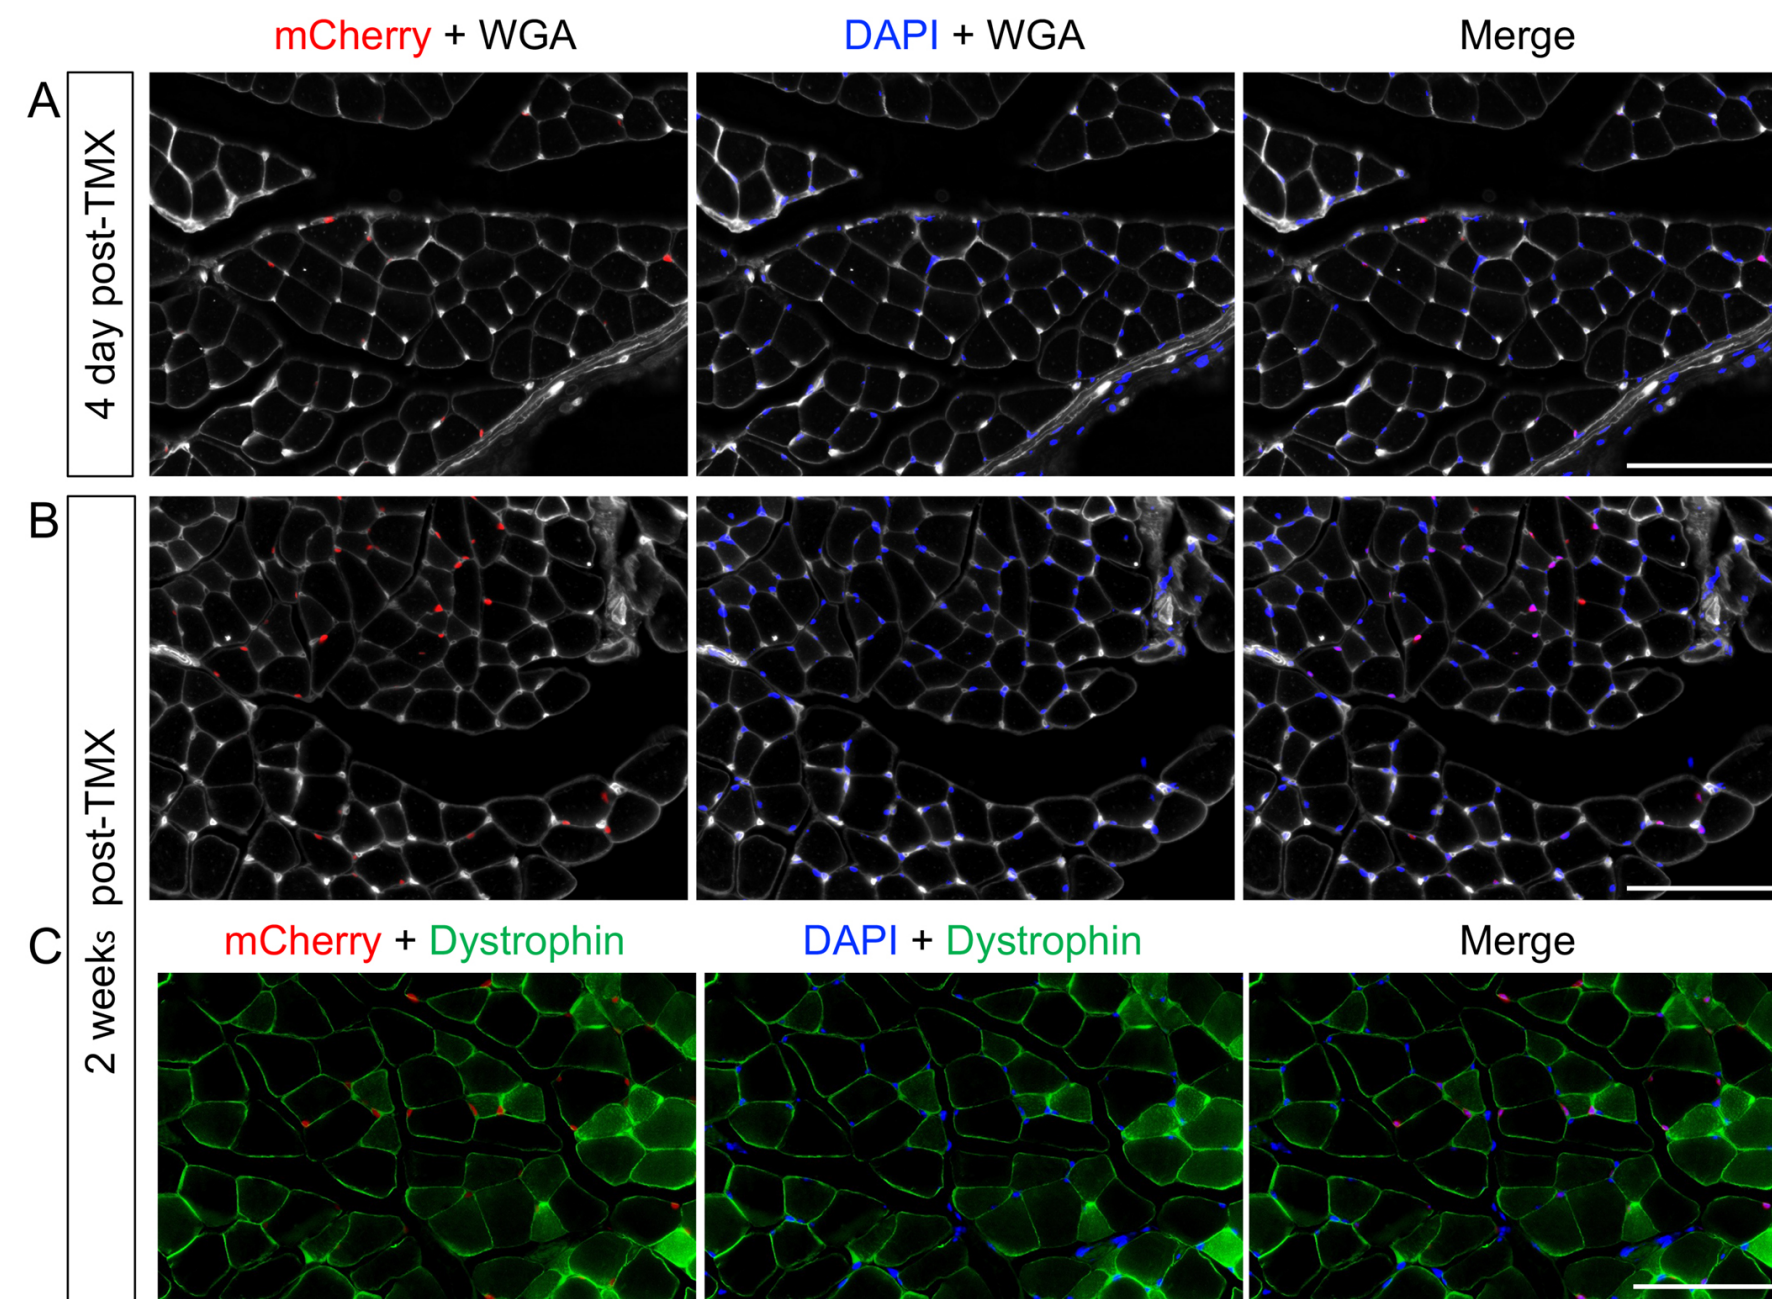

**Fig. S9. Hoxa11iH2BmCherry-labeled nuclei overlap with nuclear stain.** H2BmCherry expression in nuclei shown in Fig. 5 was confirmed with DAPI nuclear stain in images 4 days (**A**), 2 weeks (**B**) post tamoxifen, and dystrophin stain (**C**). Muscle fiber outer membranes were stained with WGA (**A,B**). Scale bars = 100  $\mu$ m. N = 3 animals (4 day) and 2 animals (2 weeks).

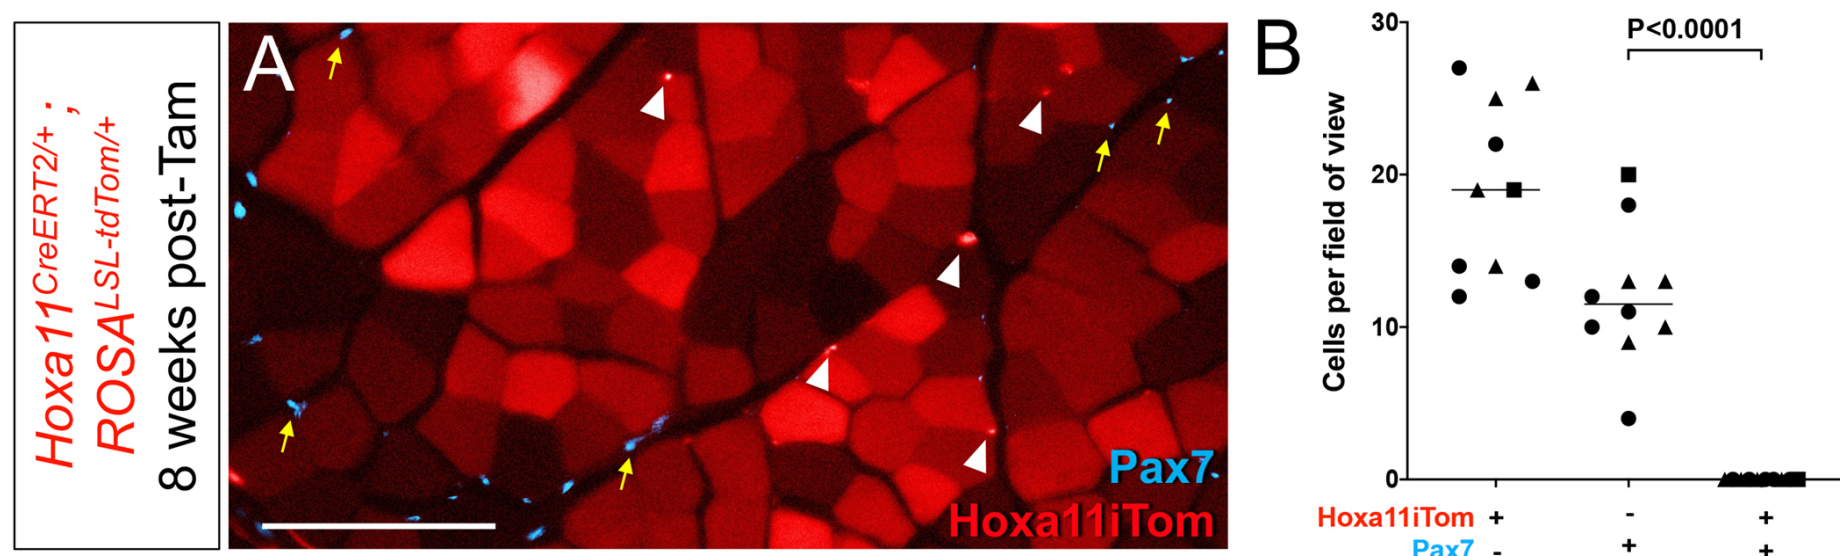

**Fig. S10. Hoxa11 lineage does not label satellite cells 8 weeks post-induction of lineage reporter.** (A) Forelimb muscle sections from animals 8 weeks (dosing at 8 weeks of age, collection at 16 weeks of age) after the start of lineage labeling were stained for Pax7 (cyan, yellow arrows) and analyzed for overlap of Hoxa11itom (red, arrowheads) and Pax7. (B) Quantification shows no Hoxa11iTom+/Pax7+ cells were observed through forelimb muscles. Scale bar = 100  $\mu$ m. N = 3 animals.



Table S1. Antibodies

| Name                          | Source                      | Catalog Number | Dilution | Antigen retrieval |
|-------------------------------|-----------------------------|----------------|----------|-------------------|
| anti-GFP                      | Aves Labs                   | GFP-1010       | 1:200    | No                |
| anti-Twist2                   | Abcam                       | ab66031        | 1:200    | No                |
| anti-PDGFRa                   | Abcam                       | ab61219        | 1:50     | No                |
| anti-Tcf4                     | Cell Signaling              | 2569S          | 1:100    | No                |
| WGA-647                       | Invitrogen                  | W32466         | 1:250    | No                |
| WGA-488                       | Invitrogen                  | W11261         | 1:250    | No                |
| anti-Pax7                     | DSHB                        | Pax7-S         | 1:10     | Yes               |
| anti-Laminin                  | Sigma                       | L9393          | 1:500    | No                |
| anti-My32                     | Sigma                       | M4276          | 1:400    | Yes               |
| anti-PECAM1                   | DSHB                        | 2H8-S          | 1:10     | No                |
| anti-BF-F3                    | DSHB                        | BF-F3          | 1:10     | Yes               |
| anti-SC-71                    | DSHB                        | SC-71          | 1:10     | Yes               |
| anti-Myosin (Skeletal, Slow)  | Sigma                       | M8421          | 1:250    | Yes               |
| anti-Scal(Ly6A/E)-BV711       | Biolegend                   | 108131         | 1:100    | No                |
| anti-CD34-PE-Cy7              | Biolegend                   | 119325         | 1:100    | No                |
| anti-CD31-PE-CF594            | BD-Horizon                  | 563616         | 1:100    | No                |
| anti-ITGA7-AF647              | AbLab                       | 67-0010-05     | 1:100    | No                |
| anti-CD45-FITC                | Biolegend                   | 304005         | 1:100    | No                |
| anti-CD106(VCAM1)-PE/Cy7      | Biolegend                   | 105719         | 1:40     | No                |
| Alexa-488 Donkey anti-Chicken | Jackson ImmunoResearch Labs | 016-580-084    | 1:500    | No                |
| Alexa-555 Donkey anti-Rabbit  | Invitrogen                  | A31572         | 1:500    | No                |
| Streptavidin-AF647            | Invitrogen                  | S21374         | 1:500    | No                |
| Anti-Dystrophin               | Thermofisher                | PA1-21011      | 1:100    | Yes               |
